# Supplementary material
Source: Springer Nature journal article supplement (https://www.springermedizin.de/resource/supplementary/12993_2013_457_MOESM1_ESM.pdf/9617816)

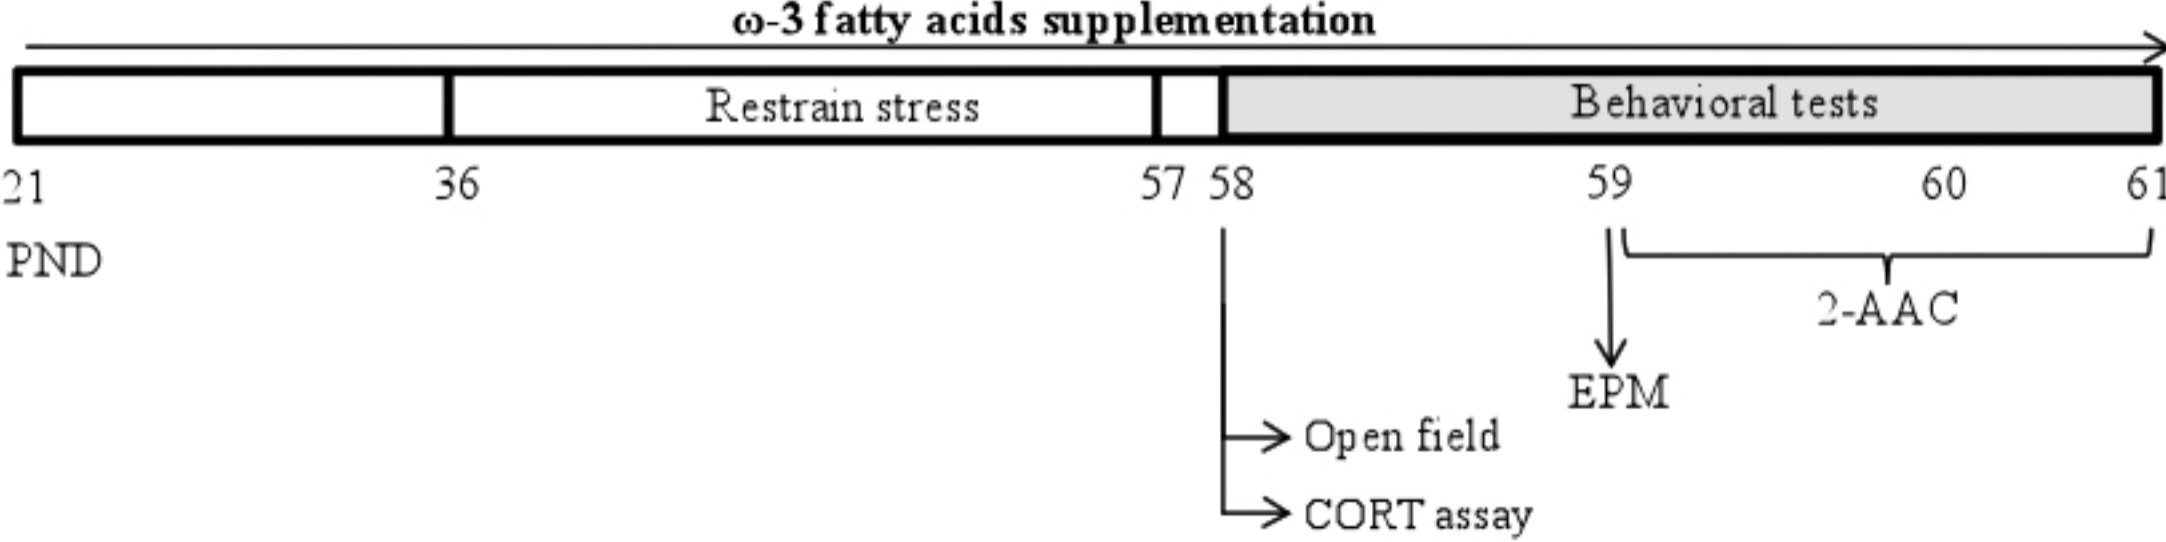

Supplement: MOESM1 [file 9617816]
